# Supplementary material
Source: PubMed Central journal article supplement (PMC8110668)

# Liver Cytosolic/Mitochondrial Enriched Proteome

**a**

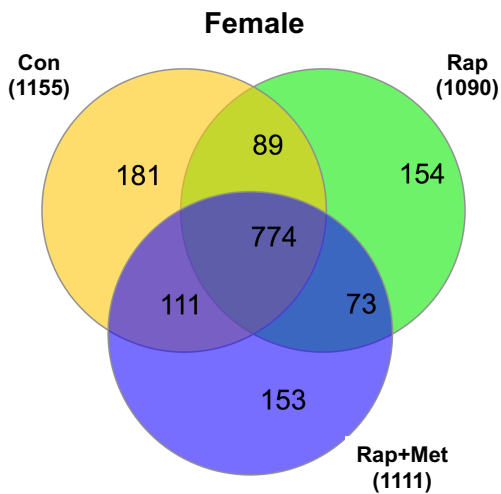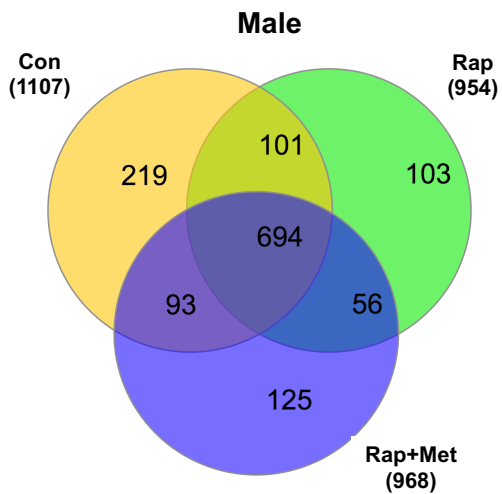

# Muscle Mitochondrial Enriched Proteome

**b**

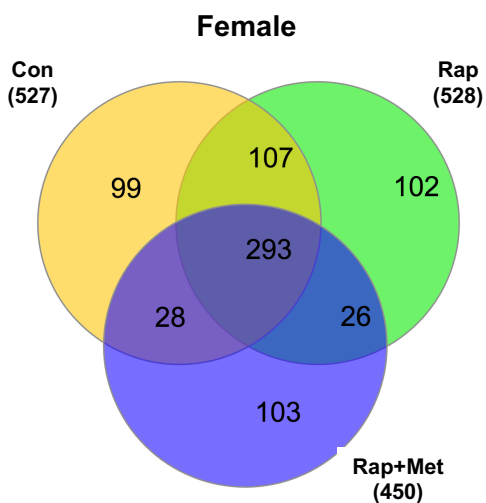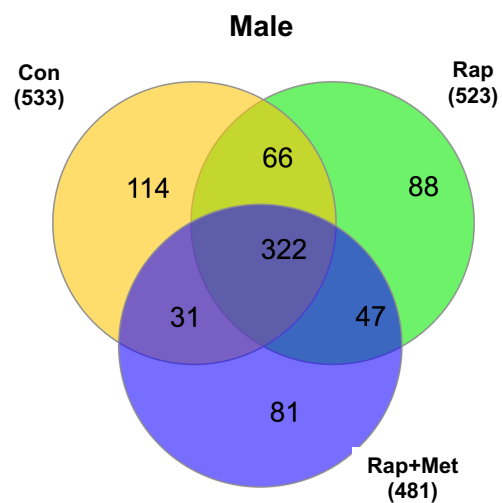

# Muscle Cytosolic Enriched Proteome

**c**

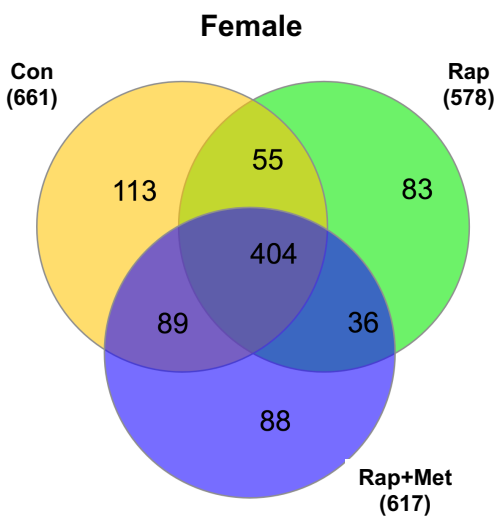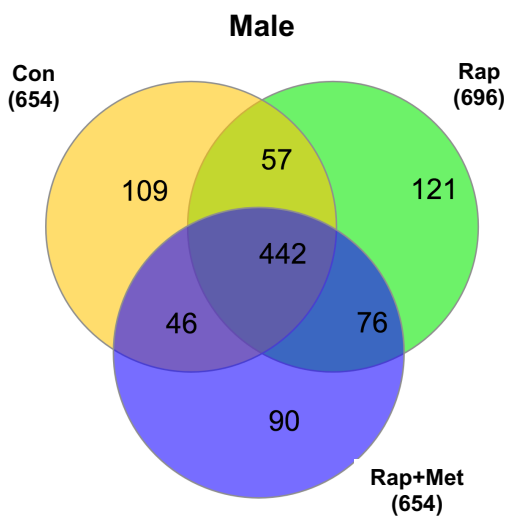

Supplement: 11357_2020_243_MOESM2_ESM.pdf [file 11357_2020_243_MOESM2_ESM.pdf]
